# Supplementary material for: Computational study of the fundamental properties of Zr-based chalcogenide perovskites for optoelectronics
Source: Royal Society of Chemistry journal article supplement (doi:10.1039/d3cp01522j), 2023-01-01
Supplement: d3cp01522j1.pdf [file d3cp01522j1.pdf]

## Electronic supplementary information

### Computational study of the fundamental properties of Zr-based chalcogenide perovskites for optoelectronics

Diwen Liu,<sup>a\*</sup> Huihui Zeng,<sup>a</sup> Huan Peng,<sup>a</sup> and Rongjian Sa<sup>b\*</sup>

<sup>a</sup>School of Materials and Chemical Engineering, Pingxiang University, Pingxiang, 337055, China Email: [liudiwen1987@163.com](mailto:liudiwen1987@163.com)

<sup>b</sup>College of Materials and Chemical Engineering, Minjiang University, Fuzhou, 350108, China Email: [rjsa@mju.edu.cn](mailto:rjsa@mju.edu.cn)

**Table 1S** The calculated tolerance factor ( $t$ ) values of  $AZrX_3$  ( $A = Ca, Sr, Ba; X = S, Se$ ). The ionic radii of various atoms are also provided.

| Ionic     | Ionic radius (Å) | Compound   | $t$   |
|-----------|------------------|------------|-------|
| $Ca^{2+}$ | 1.34             | $CaZrS_3$  | 0.878 |
| $Sr^{2+}$ | 1.58             | $SrZrS_3$  | 0.945 |
| $Ba^{2+}$ | 1.61             | $BaZrS_3$  | 0.953 |
| $Zr^{4+}$ | 0.72             | $CaZrSe_3$ | 0.870 |
| $S^{2-}$  | 1.84             | $SrZrSe_3$ | 0.932 |
| $Se^{2-}$ | 1.98             | $BaZrSe_3$ | 0.940 |

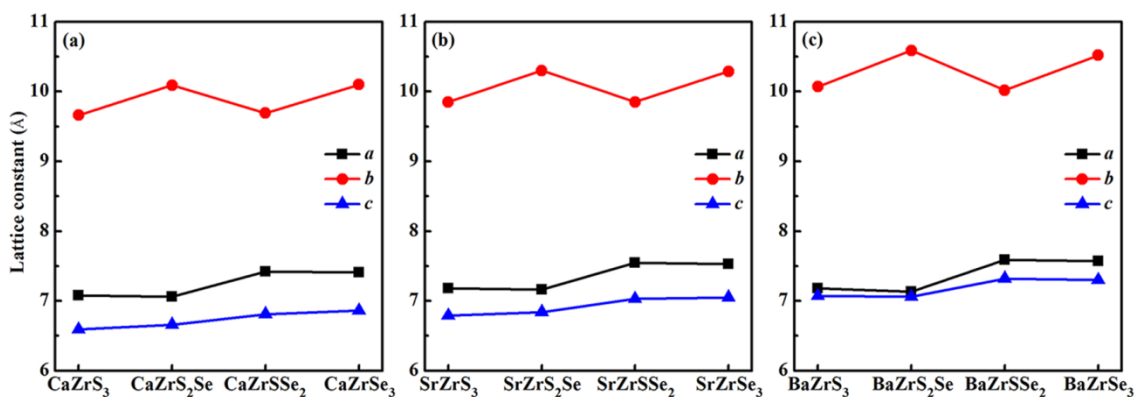

**Fig. 1S** The variation on the lattice constants of (a)  $CaZrS_{3-x}Se_x$ , (b)  $SrZrS_{3-x}Se_x$ , and (c)  $BaZrS_{3-x}Se_x$  as a function of  $x$ .

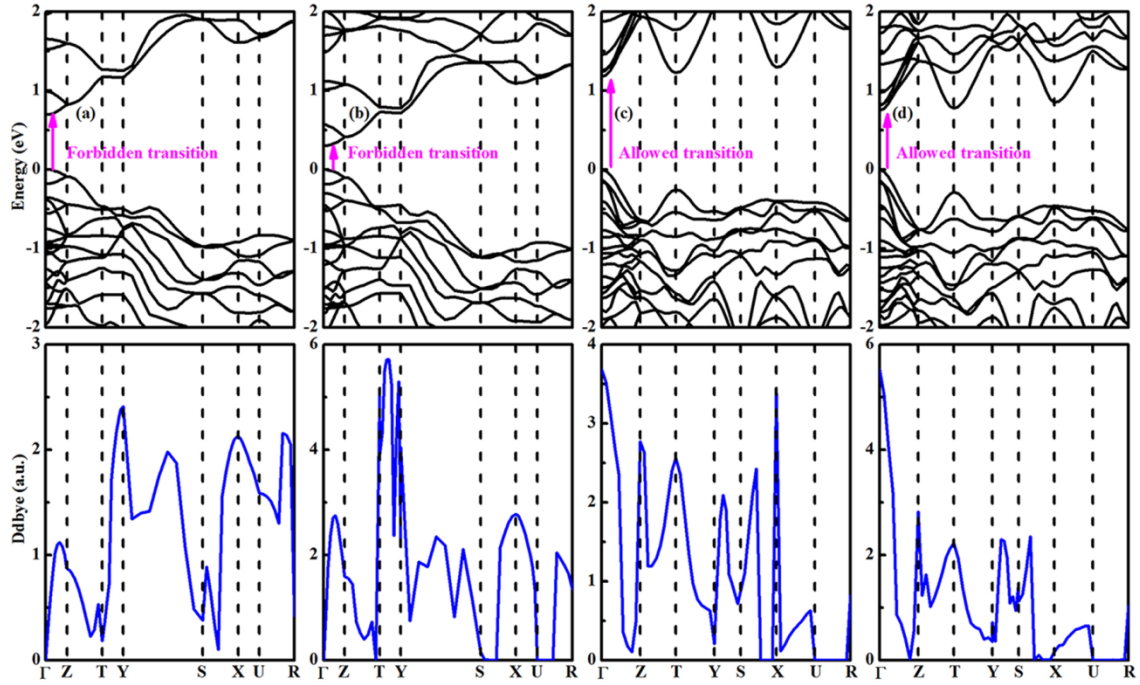

**Fig. 2S** The band structures (upper panels) and transition dipole moment (lower panels) of (a)  $\alpha$ -CaZrS<sub>3</sub>, (b)  $\alpha$ -CaZrSe<sub>3</sub>, (c)  $\beta$ -CaZrS<sub>3</sub>, and (d)  $\beta$ -CaZrSe<sub>3</sub> at the PBE functional.
